# Supplementary material for: Isolation and culture of functional adult human neurons from neurosurgical brain specimens
Source: PubMed Central journal article supplement (PMC7660143; doi:10.1093/braincomms/fcaa171), 2020-10-17
Supplement: fcaa171_supplementary_data.pdf [file fcaa171_supplementary_data.pdf]

## Supplementary Information

### Supplementary Figure 1.

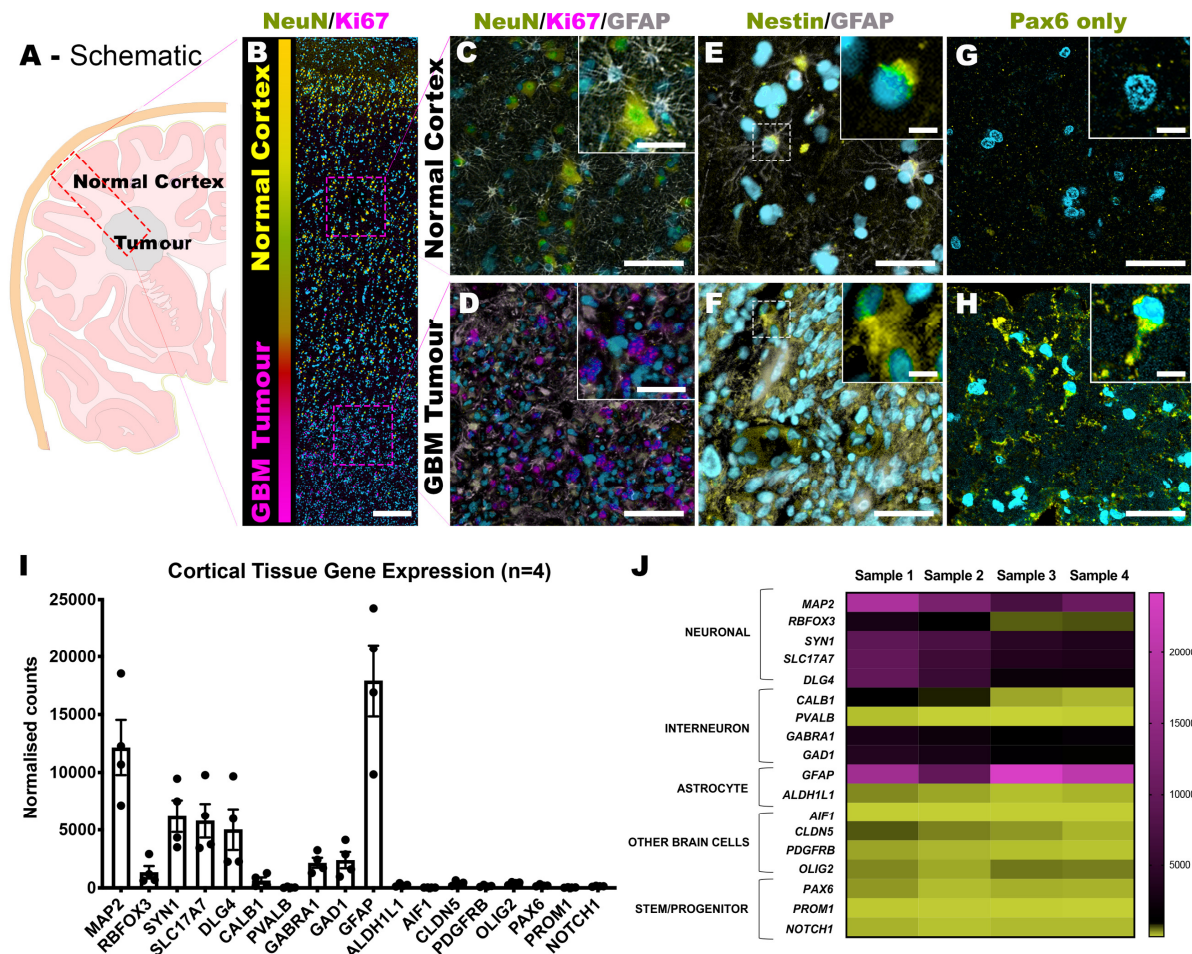

**The isolation of neuronal cultures from non-neoplastic cortical tissues excised during tumour surgeries.** A schematic illustrating the source of the resected cortical and tumour tissue (A). IHC analysis of the cortical tissue for the neuronal marker, NeuN (yellow) and the proliferating cell marker, ki67 (magenta; B). The outer cortical region was devoid of any proliferating ki67<sup>+</sup> cells (B and C), while the tumour region had large numbers of ki67<sup>+</sup> proliferating (B and D) cells. The cortical region also contained normal brain cells expressing neuronal marker NeuN (B and C), astrocyte marker GFAP (grey; C) and lacked progenitor marker Nestin (E) and Pax6 (G), while the tumour region contained significant numbers of ki67<sup>+</sup>, GFAP<sup>+</sup>, Nestin<sup>+</sup>, Pax6<sup>+</sup> tumour cells (D, F, and H). I-J: Nanostring nCounter® analysis of four surgically resected cortical tissues used for neuronal culture. The average gene counts for the four cases are shown as a bar graph (I), while the expression levels of individual cases are shown as a heat map (J). Scale: B = 200  $\mu$ m, C-D = 100  $\mu$ m, E-H = 50  $\mu$ m, insets: C-D = 50  $\mu$ m, E-H = 10  $\mu$ m.

Supplementary Figure 2.

**Neuronal culture devoid of tumour cells**

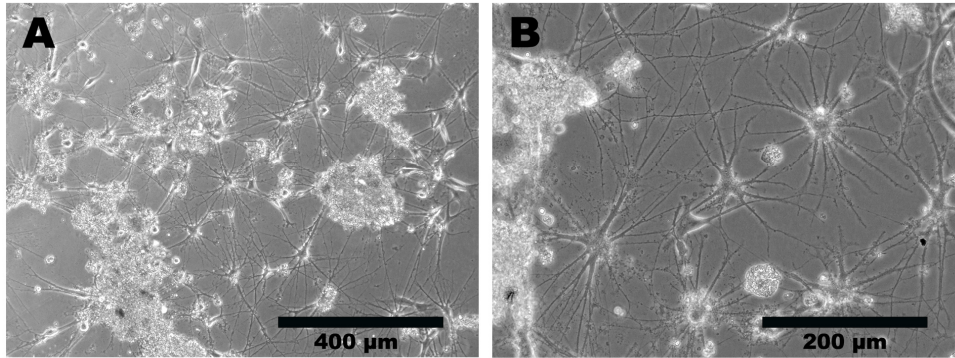

**Neuronal culture with tumour contamination**

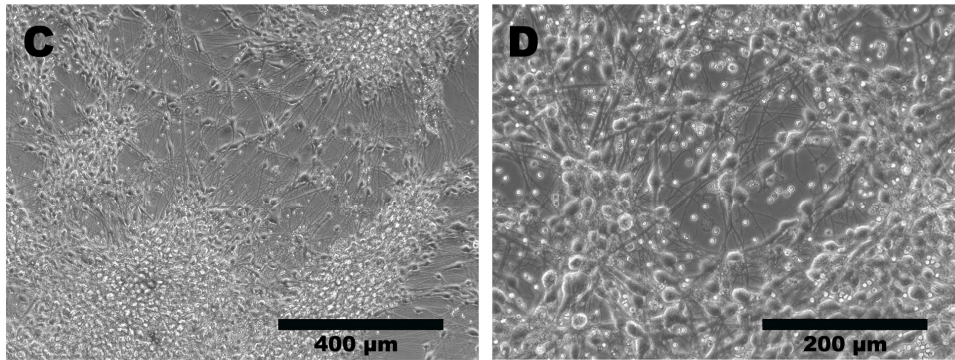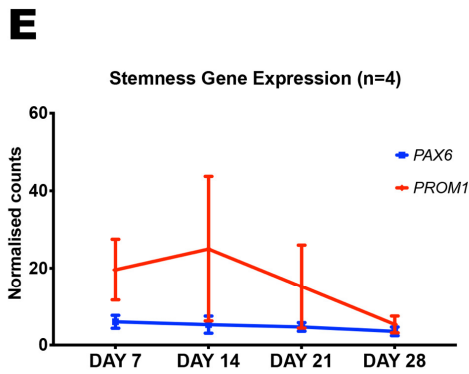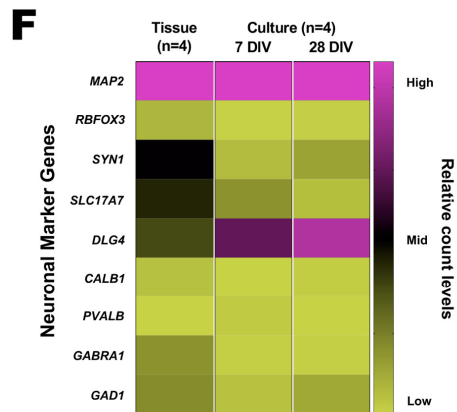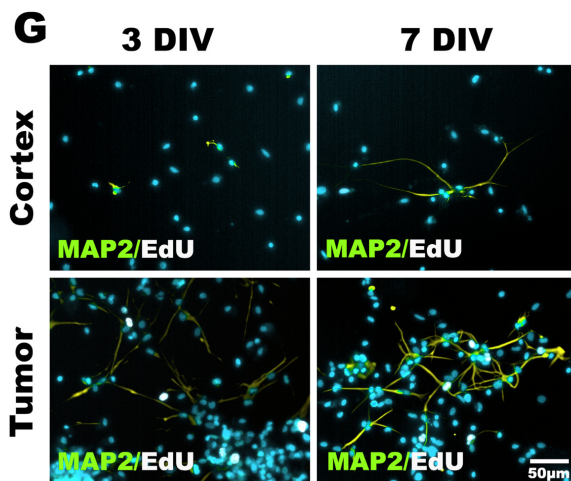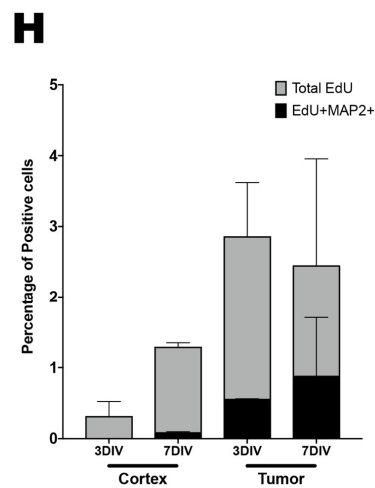

**The neuronal cultures are devoid of any detectable tumour cell contamination.**

Photomicrographs of neuronal cultures showing a high density of neurite-possessing cells in the absence (A-B) or presence of tumour cell contamination (C-D). Gene expression analysis of cultures devoid of tumour cell contamination using Nanostring® also showed low counts of stem cell and neural progenitor cell marker genes that were not regulated throughout our culture period (E), and the pattern of neuronal marker gene expression was similar in cultured cells to those of tissue (F). Panels G-H shows the relatively low levels of EdU<sup>+</sup> proliferating cells in the cortical cultures compared to the patient-matched tumour cultures, as well as the near absence of EdU<sup>+</sup>MAP2<sup>+</sup> cells in the cortical cultures.

### Supplementary Figure 3.

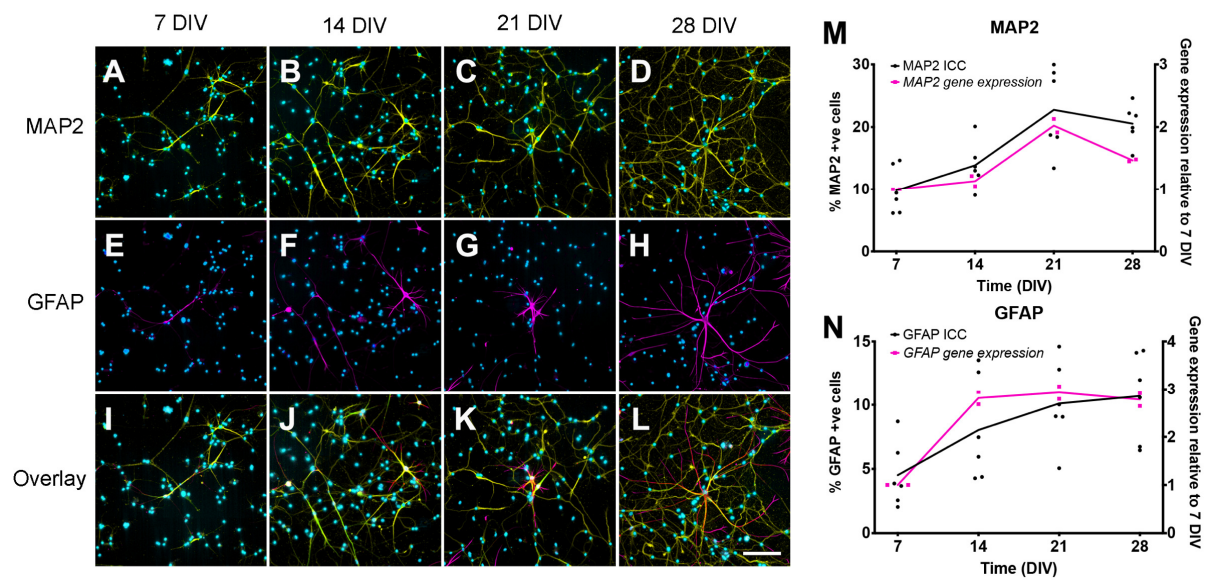

**Cells isolated from the adult human brain re-establish their neuronal and astrocytic phenotypes *in vitro*.** A-L: ICC images of MAP2 (A-D) and GFAP (E-H)-positive cells and their merged images (I-L) over the 28-day culture period. M-N: Image quantification of MAP2<sup>+</sup> (M) and GFAP<sup>+</sup> (N) cells in six cultures (n=6) and the gene expression changes of *MAP2* and *GFAP* in two of these cases (n=2). Scale bar: 100  $\mu$ m.

Supplementary Figure 4.

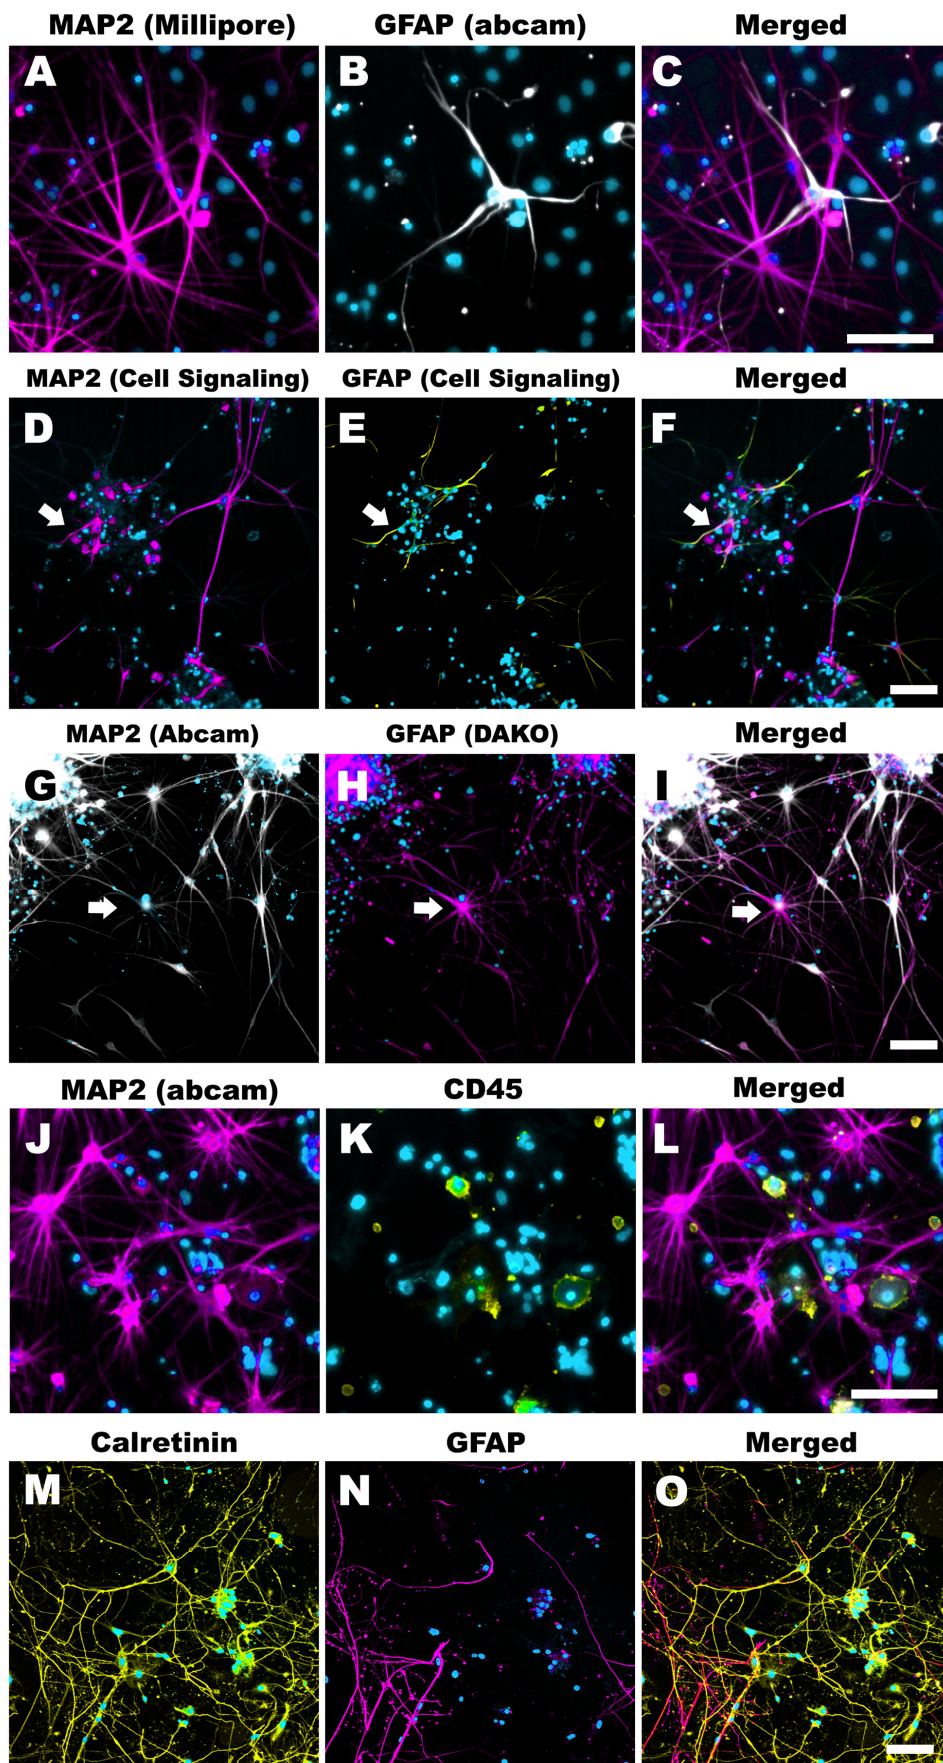

**Cells isolated from the adult human brain contain neurons, astrocyte and microglia.**

Photomicrographs illustrating neuronal cultures (MAP2<sup>+</sup>) that contain both GFAP<sup>+</sup> astrocytes and CD45<sup>+</sup> microglia. Several different combination MAP2 and GFAP antibodies were trialled and all showed MAP2 only and GFAP only cells, but also those co-expressing MAP2 and GFAP (white arrows). The cultures also contained CD45<sup>+</sup> microglia that did not co-localise with any of the neuronal markers tested. The interneuron marker, Calretinin, also labelled a large number of neurons. All images were taken from cultures at 28 DIV. Scale: 100  $\mu$ m.

Supplementary Figure 5.

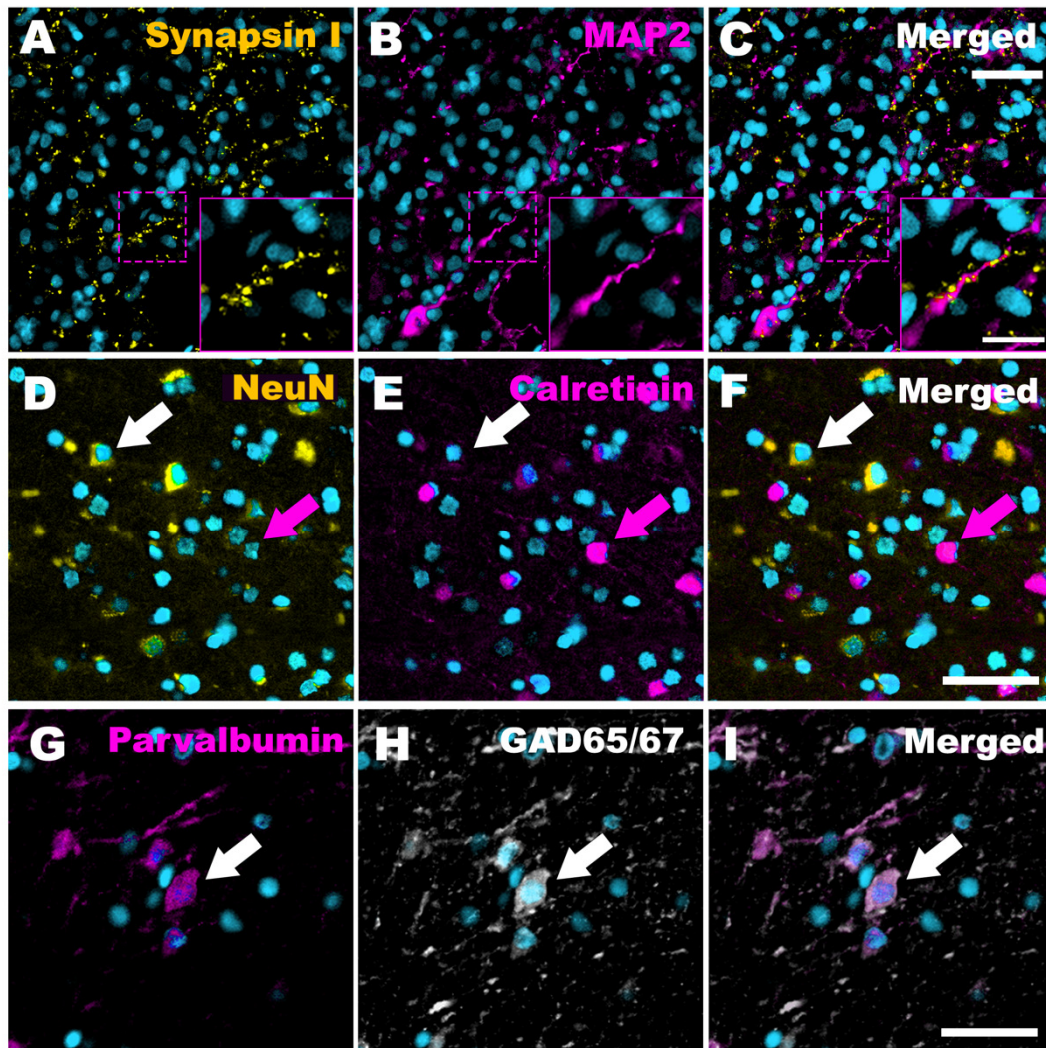

**Cortical slice tissue contained the same neuronal markers expressed in the neuronal cultures.** FFPE tissue from the same specimen as were cultured, were probed for the markers detected in neurons *in vitro*. The presynaptic marker, synapsin I, exhibited punctate staining onto MAP2<sup>+</sup> processes (A-C). Another neuronal marker, NeuN and an interneuron marker calretinin were both present in the cortical specimens (D-F). Parvalbumin (G) and GAD65/67 (H) were also present and frequently co-localized onto a single cell (I). IHC studies of neuronal markers in the corresponding cortical tissue was conducted in 15 of the 37 specimens received and the representative case is shown in Figure S3. Scale bar = 100  $\mu$ m, inset = 10  $\mu$ m.

## Supplementary Figure 6.

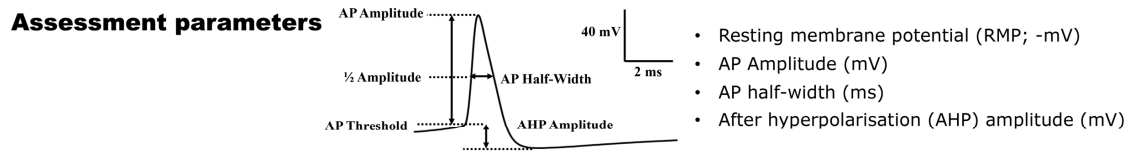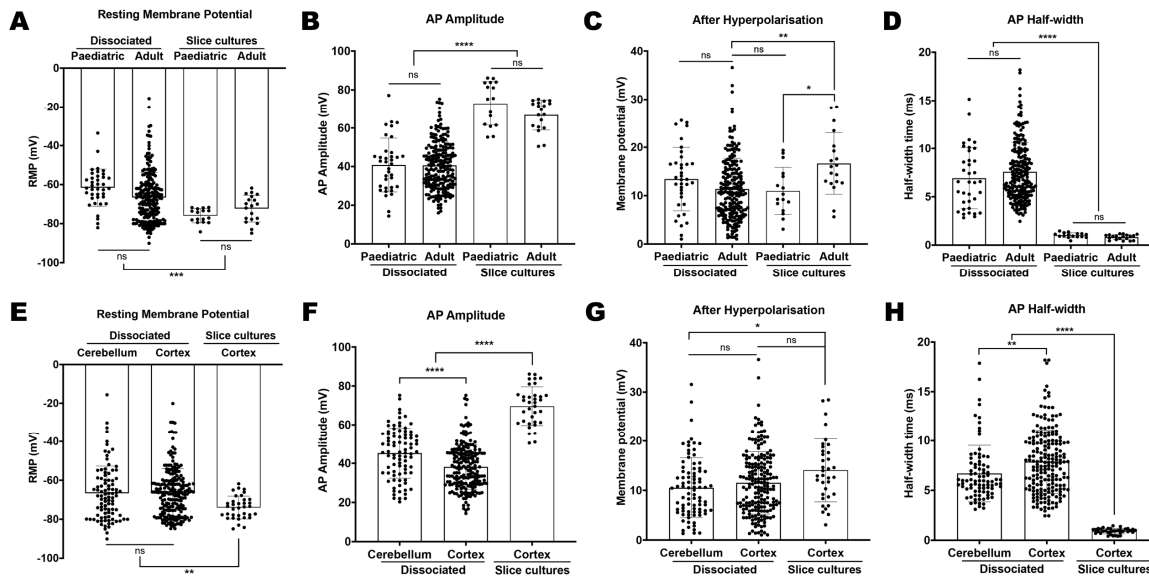

**A comparison of the electrophysiological properties of dissociated primary human neurons with human brain slice cultures.** The recorded dissociated primary neurons were categorised by age (A-D) and brain region (E-H), and assessed for RMP, AP amplitude, after-hyperpolarisation amplitude, and AP half-width, as shown in the ‘**Assessment Parameters**’ illustration. These properties were also compared to equivalent neurons recorded from brain slice cultures. **Panels A-D** compare the neurons recorded from the dissociated cultures and the cortical slice cultures from paediatric and adult cases. **Panels E-H** compare the neurons cultured from dissociated cerebellar and neocortical tissues, as well as neurons recorded from neocortex-derived slice cultures. For data with equal variance, a One-way ANOVA analysis with Tukey’s multiple comparison test was employed, and where variance were different, logarithmically transformed data was analysed using a general linear mixed model. ns =  $p > 0.05$ , \* =  $p < 0.05$ , \*\* =  $p < 0.01$ , \*\*\* =  $p < 0.001$ , and \*\*\*\* =  $p < 0.0001$ .



Supplementary Figure 7.

## Whole blot - RT-PCR

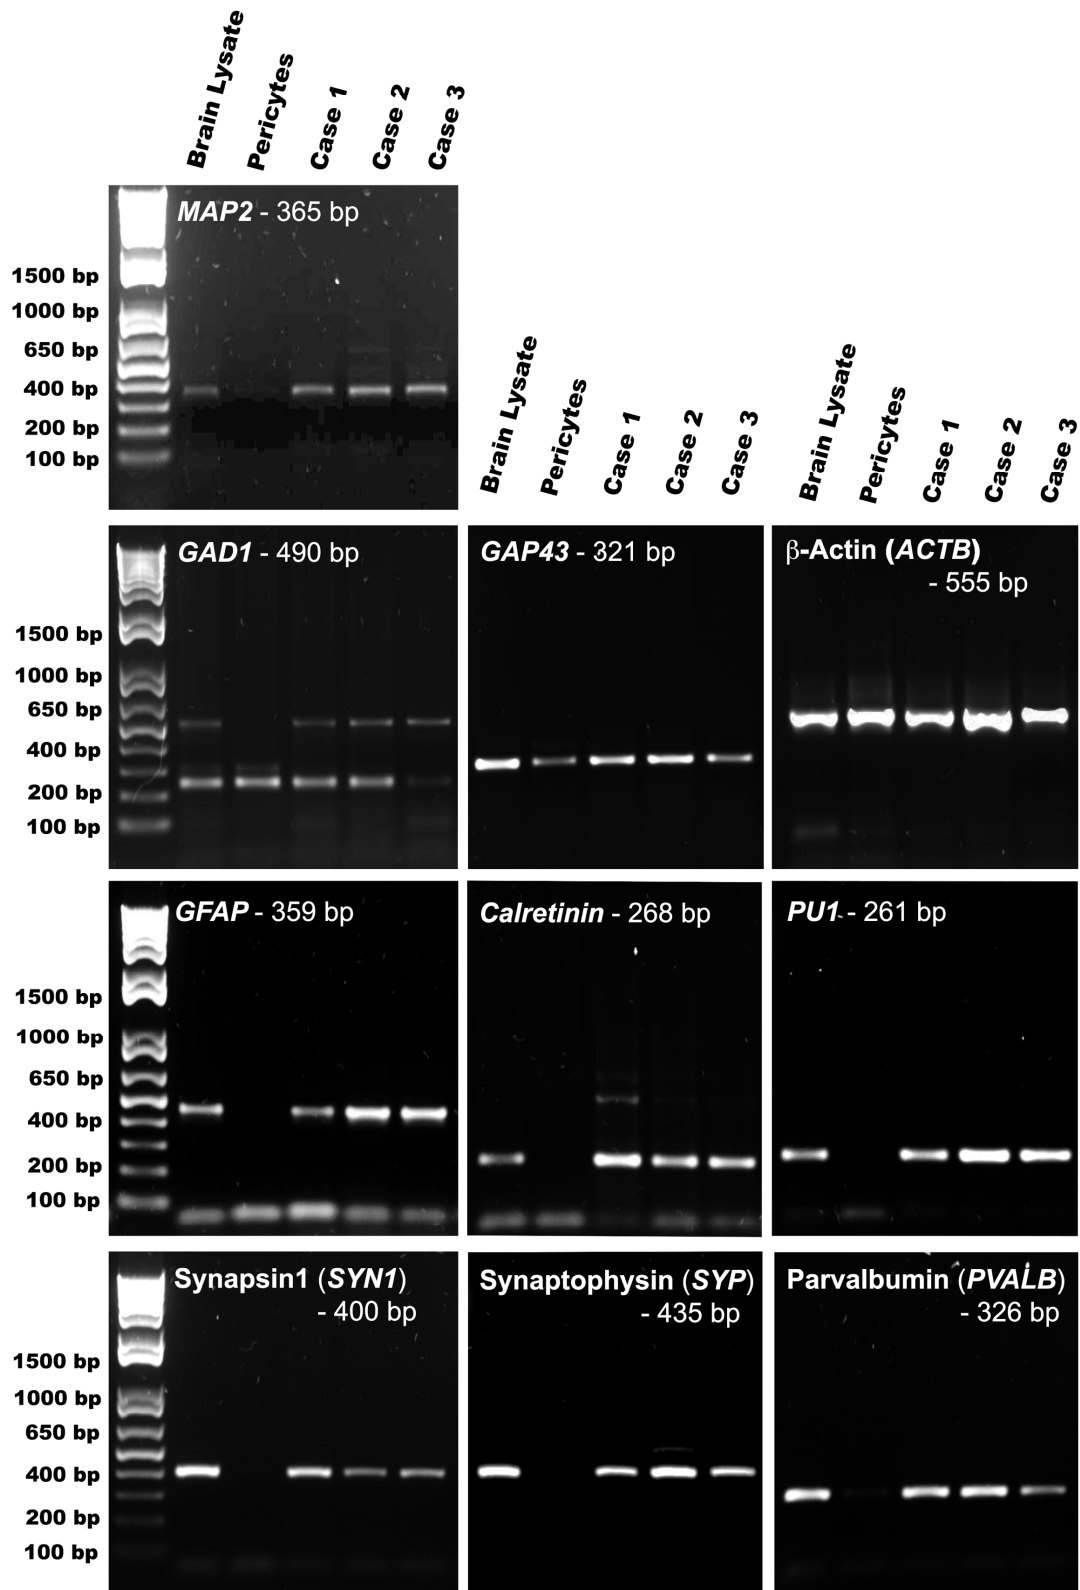

Full sized blots for the RT-PCR experiments conducted for Figure 2K on whole-brain, pericyte (negative control) and three representative neuronal cultures.

## Supplementary Tables

### Supplementary Table 1. Neurosurgical specimens used for the neuronal cultures.

Different regions of the human cortex were obtained as part of the required neurosurgical procedure for the neurological disorders listed. 51 specimens were obtained from 49 patients with an average age of  $42 \pm 3.5$  years.

| <b>Underlying pathology</b>                                                                  | <b>Cortical region</b>  | <b>Number of specimens</b> |
|----------------------------------------------------------------------------------------------|-------------------------|----------------------------|
| Primary brain tumours – high grade<br>(WHO grades III-IV)<br>GBM, anaplastic astrocytoma III | Frontal lobe            | 6                          |
|                                                                                              | Temporal lobe           | 5                          |
|                                                                                              | Occipital/Parietal lobe | 5                          |
| Primary brain tumours – low grade<br>(WHO grades I-II)                                       | Frontal lobe            | 1                          |
|                                                                                              | Temporal lobe           | 2                          |
|                                                                                              | Cerebellum              | 3                          |
| Metastatic brain tumours                                                                     | Frontal lobe            | 2                          |
|                                                                                              | Temporal lobe           | 1                          |
|                                                                                              | Cerebellum              | 4                          |
| Intractable epilepsy                                                                         | Temporal lobe           | 10                         |
|                                                                                              | Hippocampus             | 2                          |
| Paediatric cases - cortical dysplasia and<br>cortical tubers                                 | Frontal lobe            | 5                          |
|                                                                                              | Parietal lobe           | 5                          |
|                                                                                              |                         | n = 51                     |

**Supplementary Table 2.** Antibodies used for immunolabelling

| <b>Antibody</b>    | <b>Species</b> | <b>Company</b>        | <b>Catalog #</b> | <b>ICC dilution</b> | <b>IHC dilutions</b> |
|--------------------|----------------|-----------------------|------------------|---------------------|----------------------|
| <b>MAP2</b>        | Mouse          | Millipore             | MAB3418          | 1:500               | 1:500                |
| <b>MAP2</b>        | Rabbit         | Millipore             | Ab5622           | 1:500               |                      |
| <b>MAP2</b>        | Chicken        | Abcam                 | Ab5392           | 1:500               |                      |
| <b>NeuN</b>        | Rabbit         | Millipore             | ABN78            | 1:500               | 1:250                |
| <b>Calretinin</b>  | Rabbit         | Swant<br>Laboratories | 7696             | 1:2,000             | 1:2,000              |
| <b>GAD65/67</b>    | Rabbit         | Abcam                 | Ab26116          | 1:1,000             | 1:1000               |
| <b>Parvalbumin</b> | Guinea Pig     | Synaptic<br>Systems   | 195004           | 1:2,000             | 1:2000               |
| <b>ki67</b>        | Mouse          | DAKO                  | M7420            | -                   | 1:250                |
| <b>GFAP</b>        | Chicken        | Abcam                 | Ab4674           | 1:20,000            | 1:3,000              |
| <b>GFAP</b>        | Mouse          | Cell Signaling        | 3670             | 1:10,000            |                      |
| <b>GFAP</b>        | Rabbit         | DAKO                  | Z0334            | 1:10,000            |                      |
| <b>Synapsin I</b>  | Rabbit         | Sigma Aldrich         | S193-10UG        | 1:200               | 1:200                |
| <b>vGlut-1</b>     | Guinea Pig     | Synaptic<br>Systems   | 135304           | 1:200               | -                    |
| <b>CD45</b>        | Mouse          | Abcam                 | Ab8216           | 1:500               |                      |
| <b>Nestin</b>      | Mouse          | Millipore             | MAB5326          | 1:500               | 1:500                |
| <b>PSD95</b>       | Mouse          |                       |                  |                     |                      |

**Supplementary Table 3.** List and sequence of primers used for RT-PCR experiments

| <b>Gene name<br/>Accession number</b> | <b>Primer sequence<br/>(Forward/reverse)</b>   | <b>Start<br/>BP</b> | <b>Stop<br/>BP</b> | <b>Amplicon<br/>Length</b> |
|---------------------------------------|------------------------------------------------|---------------------|--------------------|----------------------------|
| <i>ACTB</i><br>NM_001101              | AGCACGGCATCGTCACCAACT<br>AGCGGAACCGCTCATTGCCA  | 215<br>769          | 235<br>750         | 555 bp                     |
| <i>MAP2</i><br>NM_001039538           | TCCAGTTTCTGCGCCCA<br>GACAAGTCCTTCCCCTGCTC      | 213<br>577          | 229<br>558         | 365 bp                     |
| <i>GAP43</i><br>NM_001130064          | GCTGTGCTGTATGAGAAGAACC<br>GCGGGGTGGCATAATTCAGA | 389<br>709          | 410<br>690         | 321 bp                     |
| <i>SYP</i><br>NM_003179               | GCCAACAAGACCGAGAGTGA<br>GTTGAGTCCCGAGGTCACAG   | 188<br>622          | 207<br>603         | 435 bp                     |
| <i>SYN1</i><br>NM_006950              | TGAAGCCGGATTTTGTGCTG<br>ACACGCACGTCATATTTGGC   | 662<br>1076         | 681<br>1057        | 400 bp                     |
| <i>PVALB</i><br>NM_001315532          | CTCTGCCCGCTCAAACAGTT<br>CAACCCCAATTTTGCCGTCC   | 6<br>331            | 25<br>312          | 326 bp                     |
| <i>CALB2</i><br>NM_001740             | AGATGTCCCGACTCCTGCCT<br>ACAATCTCCAGGTCCTTGCG   | 604<br>871          | 623<br>852         | 268 bp                     |
| <i>GADI</i><br>NM_000817              | GCAAAACCGTGAGCTGGATT<br>TTAGTGGTATTGGGGTCCGC   | 1<br>490            | 20<br>471          | 490 bp                     |
| <i>GFAP</i><br>NM_001131019           | CAGTTATCAGGAGGCGCTGG<br>CAAAGCGCCGTGTCTGAGAG   | 1032<br>1390        | 1051<br>1371       | 359 bp                     |
| <i>PUI</i><br>NM_001080547            | AATGTCAAGGGAGGGGCTC<br>GGCGTTGGTATAGATCCGTGT   | 57<br>317           | 76<br>297          | 261 bp                     |

**Supplementary Table 4.** List and sequence of primers used for qRT-PCR experiments

| <b>Gene name<br/>Accession number</b> | <b>Primer sequence<br/>(Forward/reverse)</b>     | <b>Start<br/>BP</b> | <b>Stop<br/>BP</b> | <b>Amplicon<br/>Length</b> |
|---------------------------------------|--------------------------------------------------|---------------------|--------------------|----------------------------|
| <i>ACTB</i><br>NM_001101              | TGGTGGGCATGGGTCAGAAGGA<br>ATGCCGTGCTCGATGGGGTACT | 131<br>224          | 152<br>203         | 94 bp                      |
| <i>MAP2</i><br>NM_001039538           | TCGCAGAGCAGGGAAGAGTGGT<br>AACTTGGTGGGGTGCCAGGAGT | 849<br>928          | 870<br>907         | 80 bp                      |
| <i>GFAP</i><br>NM_002055              | TGACCGCTTTGCCAGCTACATCG<br>TCAGCAGCCAGCGCCTTGTTT | 231<br>299          | 253<br>279         | 69 bp                      |

**Supplementary Table 5.** List and sequence of probes used for Nanostring® nCounter experiments

| Gene name<br>Accession number   | Target sequence<br>(Probe A and Probe B)                                                                                                                                       | Position  |
|---------------------------------|--------------------------------------------------------------------------------------------------------------------------------------------------------------------------------|-----------|
| <i>TBP</i><br>NM_001172085.1    | GCACGAAGTGCAATGGTCTTTAGGTCAAGTTTACAACCAAGATT<br>CACTGTCCTCAAGACCTAAGCGACAGCGTGACCTTGTTTCA<br>CGAAAGCCATGACCTCCGATCACTCTCCTCATGATTACCGCAGCA<br>AACCGCTTGGGATTATATTCGGCGTTTCGG   | 588-687   |
| <i>RPL13A</i><br>NM_012423.2    | TCCTTGCTCCCAGCTTCCTATGTCCAGGGCTGCCATCCTCTTCT<br>TTTCTTGGTGTTGAGAAGATGCTC<br>CGAAAGCCATGACCTCCGATCACTATTCTCCGAGTGCTTTCAAG<br>CAACTTCGGGAGGCAGTGACTAAGACCCTT                     | 721-820   |
| <i>RPS17</i><br>NM_001021.4     | CGGAGCTTTTTGCTGGGATAATGGCGATCTCCTCGCACACGCGC<br>TTGTTACAATTCTGCGGGTTAGCAGGAAGGTTAGGGAAAC<br>CGAAAGCCATGACCTCCGATCACTCCTCTCTGAATTCGCTTCATC<br>AGATGCGTGACATAACCTGCTATCTTGTTG    | 207-306   |
| <i>RBFOX3</i><br>NM_001082575.1 | ACCCAAAACCCTTGAGCCCCGCTCGTTAAAAATGATCTCCACG<br>TCTAAACTGTTGAGATTATTGAGCTTCATCATGACCAGAAG<br>CGAAAGCCATGACCTCCGATCACTTCTCCCGGGCTCGGTCCAG<br>CATCTGAGCTAGTTTCAAAAAGTTACAA        | 577-676   |
| <i>MAP2</i><br>NM_031845.2      | ACAGATTTGTAACAGTGTGTTGGAACCTCGGAATCCAGCATAAC<br>AGAGTACAAAGACGCTATCTTCCAGTTTGATCGGGAAACT<br>CGAAAGCCATGACCTCCGATCACTCGCCTTCTATGGTAACAGGC<br>TCTAGAATTATCAGAAGAAAGAAACCCCC      | 5171-5270 |
| <i>SYN1</i><br>NM_006950.3      | AGAGAATCCACCATTTGGCATGGGCCACAAGGTTGAGATCAGAGA<br>ATTCGGCGAACCTAACCTCCTCGCTACATTCCTATTGTTTTT<br>CGAAAGCCATGACCTCCGATCACTCTTCAGAGACCGCACGACCT<br>TCACCCCATTCCGAAGAACTTCCATATCCAC | 566-665   |
| <i>DLG4</i><br>NM_001365.3      | GTTTATACTGAGCGATGATCGTGACCGTCTGACCCGCAATTCTTCA<br>GGGCACCAATTTGGTTTTACTCCCCTCGATTATGCGGAGT<br>CGAAAGCCATGACCTCCGATCACTCCCAGGTCGTGGATCTTG<br>GCCTCGAATCGGCTGTACTCTTCTG          | 2461-2560 |
| <i>CALB1</i><br>NM_004929.2     | CCCCAGCACAGAGAATAAGAGCAAGATCCGTTCCGGTACAGCTTC<br>CCCTTTCCGGTTATATCTATCAT<br>CGAAAGCCATGACCTCCGATCACTCTAGATACAGTGTATCACTAG<br>CAAGTGGTTGCGGCCACCAACTCTAGTTATTTACTTGACACCCT      | 911-1010  |
| <i>PVALB</i><br>NM_002854.2     | CGAAGGAGTCGGTAGCGCTAAAGGCTCCACCGCCTTCTTGATG<br>TCAACAGCCACTTTTTTCCAAATTTTGCAAGAGCC<br>CGAAAGCCATGACCTCCGATCACTCATCCGCACTTTTTTTCTTCA<br>GGCCGACCATTTGGAAGAACTTTTTGTGGT          | 77-176    |
| <i>SLC17A7</i><br>NM_020309.2   | GGCTAGGACCAGGAAGGAGATGGCCACGCCCTTGGCACCGTGT<br>GGACGGCAACTCAGAGATAACGCATAT<br>CGAAAGCCATGACCTCCGATCACTCTGGTTCACGTTGAACCCAG<br>AGATGGCGAAGCCGCTGAAGCCCAC                        | 1331-1430 |
| <i>GADI</i><br>NM_000817.2      | TTGAAGGCACTCACAAGGCGACTTCTCTTCCAGGCTGTTGGT<br>CCTTTGCCTGGAGTTTATGTATTGCCAACGAGTTTGTCTTT<br>CGAAAGCCATGACCTCCGATCACTCCCCGGTCGCTGTTTTTACA<br>GGAAAGCAGGTTCTTGGAGGATTGCCTCTCC     | 576-675   |
| <i>GABRA1</i><br>NM_000806.5    | GCTCAGAAGGAGGATCCAGGCCAAAGACAGTCAGACAGACCA<br>GATAAGGTTGTTATTGTGGAGGATGTTACTACA<br>CGAAAGCCATGACCTCCGATCACTCTTAAGTTCATCTTGTAATGA<br>CGGCTGTCCATAGCTTCTTCCAGTCAGTGT             | 476-575   |
| <i>GFAP</i><br>NM_002055.4      | CTCAATCTTCTCTCCAGATCCAGACGGGCCAGGGCTGTTGAGAT<br>TATTGAGCTTCATCATGACCAGAAG<br>CGAAAGCCATGACCTCCGATCACTCCGTGGATCTTCTCAAGAA<br>CCGGATCTCTCCTCCAGCGA                               | 590-689   |
| <i>ALDH1L1</i><br>NM_012190.2   | TCCTTTTGCACGCCACCGGAGTACTTGAATACCGGCACTCCATC<br>AAAGACGCTATCTTCCAGTTTGATCGGGAAACT<br>CGAAAGCCATGACCTCCGATCACTCCCCAAAGCCTGGTATTTTG<br>CCACCACATCAGGCAAAGCCTG                    | 330-429   |

|                                              |                                                                                                                                                                                |           |
|----------------------------------------------|--------------------------------------------------------------------------------------------------------------------------------------------------------------------------------|-----------|
| <b><i>OLIG2</i></b><br><b>NM_005806.2</b>    | ATTGGATATGACCATCAGCGCTTCTGATACCGAACGCCGGCTTCC<br>AACTACGAACCTAACTCCTCGCTACATTCCTATTGTTTTTC<br>CGAAAGCCATGACCTCCGATCACTCGGAGGAACGGCCACAGTTC<br>TAAGAGGGTGTGGATTGACCCAGATATTGAG  | 1691-1790 |
| <b><i>PROM1</i></b><br><b>NM_006017.1</b>    | CTTGATGGATGCACCAAGCACAGAGGGTCATTGAGAGATGACCG<br>CAGGCTCCAATTTGGTTTTACTCCCCTCGATTATGCGGAGT<br>CGAAAGCCATGACCTCCGATCACTCGGTTGCTATTCAGCTGGCTT<br>AGAGACAATCTGATGCTGTTGCAGGTTTCA   | 926-1025  |
| <b><i>NOTCH1</i></b><br><b>NM_017617.3</b>   | TATTTTCAGATGCAAATTAATCCGCGTGCGGAAGGTGAGCCAGCTT<br>TGCCTCTTTCGGGTTATATCTATCATTTACTTGACACCCT<br>CGAAAGCCATGACCTCCGATCACTCCCATCTAAAACACATGGCA<br>ACATCTAACCCATATGCTTTCACTTGTTTTCC | 8212-8311 |
| <b><i>PAX6</i></b><br><b>NM_000280.3</b>     | CTCAAACCTCTTTCTCCAGGGCCTCAATTTGCTCTTGGGTAAAGGA<br>TGTTCCAACAGCCACTTTTTTCCAAATTTTGCAAGAGCC<br>CGAAAGCCATGACCTCCGATCACTCATTTTGGCTGCTAGTCTTTC<br>TCGGGCAAACACATCTGGATAATGGGTTCT   | 1174-1273 |
| <b><i>PDGFRB</i></b><br><b>NM_002609.3</b>   | CTGGTGCAGGCTCCTGAAGGCTCAGGAGAACAGAGGGATGCAC<br>CGTGTGGACGGCAACTCAGAGATAACGCATAT<br>CGAAAGCCATGACCTCCGATCACTCGTCCCAGAGTGGGTAACAG<br>CTGAGTAGAAGGACAGGCAGGA                      | 266-365   |
| <b><i>CLDN5</i></b><br><b>NM_001130861.1</b> | GGAAACTTCATTCCGTCTGTTAAGGGCAGGGCCGGGCTAGCCTG<br>GAGTTTATGTATTGCCAACGAGTTTGTCTTT<br>CGAAAGCCATGACCTCCGATCACTCCAGTCTGACACCCGCTCTG<br>CCTATGGAAACAGCGCCGCGCACAGAAAA               | 1924-2023 |
| <b><i>AIFI</i></b><br><b>NM_032955.1</b>     | CTCCCCGGAGCCACTGGACACCTCTCCAATTAATTTCTTTAGCTC<br>TAGGTCAGATAAGGTTGTTATTGTGGAGGATGTTACTACA<br>CGAAAGCCATGACCTCCGATCACTCGCAGATCTCTTGCCAGCAT<br>CATCCTGAGAAAAGTCAGGGTAGCTGAACGT   | 186-285   |

**Supplementary Table 6:** Table summarizing individual patient details for all the cases included in this study.

| <b>Cases<br/>(n = 49)</b> | <b>Age</b> | <b>Gender</b> | <b>Cortical region<br/>(n = 51)</b> | <b>Underlying Pathology</b> |
|---------------------------|------------|---------------|-------------------------------------|-----------------------------|
| Tumour                    | 60         | Male          | Parietal lobe                       | GBM                         |
| Tumour                    | 52         | Female        | Parietal lobe                       | Anaplastic Astrocytoma III  |
| Tumour                    | 52         | Male          | Cerebellum                          | Metastatic tumour           |
| Tumour                    | 70         | Male          | Frontal lobe                        | GBM                         |
| Tumour                    | 30         | Female        | Temporal lobe                       | Anaplastic Astrocytoma III  |
| Tumour                    | 57         | Male          | Temporal lobe                       | GBM                         |
| Tumour                    | 57         | Female        | Parietal lobe                       | GBM                         |
| Tumour                    | 55         | Female        | Temporal lobe                       | GBM                         |
| Tumour                    | 62         | Male          | Temporal lobe                       | Anaplastic Astrocytoma III  |
| Tumour                    | 49         | Female        | Frontal lobe                        | Metastatic tumour           |
| Tumour                    | 75         | Female        | Temporal lobe                       | Diffuse Astrocytoma I-II    |
| Tumour                    | 58         | Male          | Cerebellum                          | Hemangioblastoma            |
| Tumour                    | 28         | Female        | Frontal lobe                        | Meningioma I-II             |
| Tumour                    | 23         | Male          | Temporal lobe                       | Metastatic tumour           |
| Tumour                    | 83         | Male          | Parietal lobe                       | GBM                         |
| Tumour                    | 81         | Male          | Frontal lobe                        | GBM                         |
| Tumour                    | 78         | Female        | Frontal lobe                        | GBM                         |
| Tumour                    | 75         | Male          | Frontal lobe                        | GBM                         |
| Tumour                    | 76         | Male          | Temporal lobe                       | GBM                         |
| Tumour                    | 79         | Male          | Cerebellum                          | Hemangioblastoma            |
| Tumour                    | 46         | Male          | Cerebellum                          | Metastatic tumour           |
| Tumour                    | 24         | Male          | Frontal lobe                        | GBM                         |
| Tumour                    | 20         | Male          | Cerebellum                          | Metastatic tumour           |
| Tumour                    | 64         | Male          | Frontal lobe                        | Metastatic tumour           |
| Tumour                    | 66         | Male          | Cerebellum                          | Meningioma                  |
| Tumour                    | 66         | Male          | Occipital lobe                      | GBM                         |
| Tumour                    | 58         | Female        | Cerebellum                          | Metastatic tumour           |
| Tumour                    | 52         | Female        | Frontal lobe                        | GBM                         |
| Epilepsy                  | 52         | Female        | Temporal lobe<br>Hippocampus        | Intractable Epilepsy        |
| Epilepsy                  | 42         | Female        | Temporal lobe                       | Intractable Epilepsy        |
| Epilepsy                  | 30         | Male          | Temporal lobe                       | Intractable Epilepsy        |
| Epilepsy                  | 51         | Female        | Temporal lobe                       | Intractable Epilepsy        |
| Epilepsy                  | 40         | Male          | Temporal lobe                       | Intractable Epilepsy        |
| Epilepsy                  | 23         | Male          | Temporal lobe                       | Intractable Epilepsy        |
| Epilepsy                  | 35         | Female        | Temporal lobe                       | Intractable Epilepsy        |
| Epilepsy                  | 29         | Female        | Temporal lobe                       | Intractable Epilepsy        |



|            |    |        |               |                      |
|------------|----|--------|---------------|----------------------|
| Epilepsy   | 36 | Male   | Temporal lobe | Intractable Epilepsy |
| Epilepsy   | 43 | Male   | Temporal lobe | Intractable Epilepsy |
| Paediatric | 14 | Female | Parietal lobe | Cortical dysplasia   |
| Paediatric | 7  | Male   | Frontal lobe  | Cortical tuber       |
| Paediatric | 12 | Female | Frontal lobe  | Cortical dysplasia   |
| Paediatric | 5  | Male   | Parietal lobe | Cortical tuber       |
| Paediatric | 3  | Male   | Parietal lobe | Cortical dysplasia   |
| Paediatric | 9  | Male   | Parietal lobe | Cortical dysplasia   |
| Paediatric | 3  | Female | Parietal lobe | Cortical tuber       |
| Paediatric | 10 | Female | Frontal lobe  | Intractable Epilepsy |
| Paediatric | 3  | Female | Frontal lobe  | Cortical tuber       |
| Paediatric | 15 | Male   | Temporal lobe | Benign tumour        |
| Paediatric | 1  | Male   | Frontal lobe  | Cortical dysplasia   |
| Paediatric | 4  | Male   | Parietal lobe | Cortical tuber       |

**Supplementary Table 7:** A summary of the number of cases used for each experimental paradigm.

| <b>Experimental methods</b>   | <b>Cases studied<br/>(total = 49)</b> | <b>Percentage</b> |
|-------------------------------|---------------------------------------|-------------------|
| IHC Analysis                  | 21/49                                 | 43%               |
| ICC Analysis                  | 22/49                                 | 45%               |
| RNA Analysis                  | 14/49                                 | 29%               |
| Electrophysiological Analysis | 24/49                                 | 49%               |

**Supplementary Table 8:** The percentage of patch-clamp recorded cells from adult specimens showing active membrane properties (neuron or astrocyte-like traces) from each specimen type. Temporal lobe = Non-tumour epilepsy surgery, Peri-tumoural neocortex, Cerebellum = non-tumoural cerebellar cortex obtained in gaining access to brain stem complications.

| <b>Region</b>                       | <b>AP Firing</b> |                  | <b>Non-AP firing<br/>(Astrocyte-like)</b> |
|-------------------------------------|------------------|------------------|-------------------------------------------|
|                                     | <b>Multi</b>     | <b>Single</b>    |                                           |
| <b>Temporal lobe (n=175)</b>        | 6 (4%)           | 90 (51%)         | <b>79 (45%)</b>                           |
| <b>Peritumoral Neocortex (n=60)</b> | 2 (3%)           | 30 (50%)         | <b>28 (47%)</b>                           |
| <b>Cerebellum (n=143)</b>           | 36 (25%)         | 58 (41%)         | <b>49 (34%)</b>                           |
| <b>Total cells (n=378)</b>          | <b>44 (12%)</b>  | <b>178 (47%)</b> | <b>156 (41%)</b>                          |

**Supplementary Table 9:** The resting membrane potential (RMP) of recorded cells from each specimen type (same as above - adult cases only).

| <b>Region/ Underlying Pathology</b> | <b>AP Firing<br/>(RMP <math>\pm</math> SEM)</b> | <b>Non-AP firing<br/>(RMP <math>\pm</math> SEM)</b> |
|-------------------------------------|-------------------------------------------------|-----------------------------------------------------|
| <b>TL – Epilepsy (n=175)</b>        | -66.9 $\pm$ 1.2 (n=96)                          | -75.5 $\pm$ 0.9 (n=79)                              |
| <b>Neocortex – Tumour (n=60)</b>    | -62.1 $\pm$ 3.1 (n=32)                          | -74.3 $\pm$ 2.2 (n=28)                              |
| <b>Cerebellum – Tumour (n=143)</b>  | -66.8 $\pm$ 1.4 (n=94)                          | -76.4 $\pm$ 1.1 (n=49)                              |
| <b>Total cells (n=378)</b>          | -66.8 $\pm$ 0.9 (n=222)                         | -75.6 $\pm$ 0.7 (n=156)                             |

**Supplementary Table 10:** Basal and active electrophysiological properties between paediatric (<16 years of age) and adult case ( $\geq$ 16 years of age)-derived neurons (exhibiting at least a single AP). For the average age and RMP, a two-tailed student t-test was conducted. For the percentage that exhibited multiple AP and synaptic activity, the difference in population proportions test was used.

| <b>Age groups</b>               | <b>Adult<br/>(n=222)</b> | <b>Paediatric<br/>(n=38)</b>  |
|---------------------------------|--------------------------|-------------------------------|
| <b>Average age</b>              | 52.3 $\pm$ 3.1           | 7.5 $\pm$ 1.5 ( $p < 0.001$ ) |
| <b>RMP <math>\pm</math> SEM</b> | -66.6 $\pm$ 0.9          | -61.6 $\pm$ 1.5 (ns)          |
| <b>% Multiple AP</b>            | 44/222 = 19.8%           | 4/38 = 10.5% (ns)             |
| <b>% Synaptic activity</b>      | 15/222 = 6.9%            | 4/38 = 10.5% (ns)             |
| <b>Total neurons (n=260)</b>    |                          |                               |
